## Correction

## Correction: CUL4B promotes bladder cancer metastasis and induces epithelial-to-mesenchymal transition by activating the Wnt/ $\beta$ catenin signaling pathway

Xia-Wa Mao<sup>1</sup>, Jia-Quan Xiao<sup>1</sup>, Gang Xu<sup>1</sup>, Zhong-Yi Li<sup>1</sup>, Hui-Feng Wu<sup>1</sup>, Yi Li<sup>1</sup>, Yi-Chun Zheng<sup>1</sup> and Nan Zhang<sup>1</sup>

<sup>1</sup>Department of Urology, The Second Affiliated Hospital of Zhejiang University School of Medicine, Hangzhou 310009, P.R. China

**Published:**

**Copyright:** © 2021 Mao et al. This is an open access article distributed under the terms of the [Creative Commons Attribution License](https://creativecommons.org/licenses/by/3.0/) (CC BY 3.0), which permits unrestricted use, distribution, and reproduction in any medium, provided the original author and source are credited.

**This article has been corrected:** Due to errors during figure assembly, the image of the Control for the CUL4B protein in Figure 9B contains an accidental overlap of the Vimentin control image. In addition, the siRNA-NC group for the CUL4B protein is an accidental duplicate of the E-cadherin group of the CUL4B protein in Figure 9B. The corrected Figure 9 is shown below. The authors declare that these corrections do not change the results or conclusions of this paper.

Original article: Oncotarget. 2017; 8:77241–77253. <https://doi.org/10.18632/oncotarget.20455>

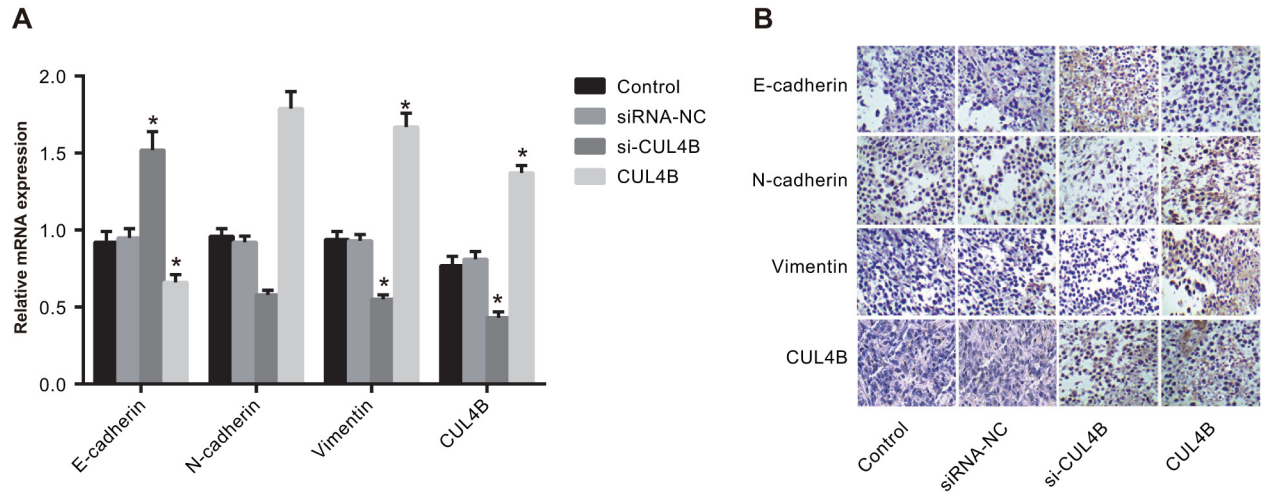

**Figure 9: Effect of CUL4B on EMT *in vivo*.** (A) mRNA expression of E-cadherin, N-cadherin, and Vimentin in nude mouse xenografts determined by qRT-PCR; (B) the protein expression of E-cadherin, N-cadherin, and Vimentin in nude mouse xenografts detected by IHC. \* compared with the control group,  $P < 0.05$ .
